# Supplementary material for: Adjusting the CO2 hydrogenation pathway via the synergic effects of iron carbides and iron oxides
Source: Royal Society of Chemistry journal article supplement (doi:10.1039/d1cy01758f), 2021-01-01
Supplement: d1cy01758f1.pdf [file d1cy01758f1.pdf]

## Supporting Information

Adjusting CO<sub>2</sub> hydrogenation pathway via synergic effects of iron carbide and iron  
oxide

Fangxu Lu, Xin Chen, Wen Wang\*, Yi Zhang\*

College of Chemical Engineering, Beijing University of Chemical Technology, 15 Beisanhuan East  
Road, Beijing 100029, PR China

Corresponding Author

\* Tel&Fax: +86 10 64436991

Email: [wangwen@mail.buct.edu.cn](mailto:wangwen@mail.buct.edu.cn) (W.W.); [yizhang@mail.buct.edu.cn](mailto:yizhang@mail.buct.edu.cn) (Y. Z.)

---

## **Experimental Section**

### **Materials**

Ferric chloride hexahydrate ( $\text{FeCl}_3 \cdot 6\text{H}_2\text{O}$ ), trisodium citrate pentahydrate ( $\text{Na}_3\text{C}_6\text{H}_5\text{O}_7 \cdot 5\text{H}_2\text{O}$ ), tritonX-100, sodium acetate was supplied by Tianjing Chemical Corp. Ethanol, ethylene glycol, and diethylene glycol were purchased from Beijing Chemical Corp. All chemicals are analytical reagent grade and used correctly in accordance with regulations. The water involved in the all experiments was deionized water.

### **Preparation of $\text{Fe}_3\text{O}_4$ microspheres**

The  $\text{Fe}_3\text{O}_4$  microspheres were synthesized via a solvothermal reaction approach. The premixed mixture  $\text{FeCl}_3 \cdot 6\text{H}_2\text{O}$  (2.0 g) and tritonX-100 (0.2 g) was dissolved in ethylene glycol (40 mL) in a round bottomed flask (250 mL capacity) via magnetic stirrer. A solution of diethylene glycol (40 mL), which contain sodium acetate (4.0 g), was then added with magnetic stirring. Afterward, the mixture was stirred vigorously for 30 min. The obtained yellow solution was then transferred and sealed into a Teflon-lined stainless-steel autoclave with a capacity of 100 mL. The autoclave was heated at 200 °C and maintained for 10 h, and then cooled to room temperature. The products were repeatedly washed with ethanol and deionized water, respectively. The fresh  $\text{Fe}_3\text{O}_4$  microspheres were obtained after dried at 60°C for 10 h in a vacuum.

### **Preparation of Na-promoted $\text{Fe}_3\text{O}_4$ microsphere catalysts**

The Na-promoted  $\text{Fe}_3\text{O}_4$  microsphere catalysts in the present work were prepared by the wet impregnation method. Briefly, the Na promoter loading of 2wt % was calculated amount from the precursor trisodium citrate pentahydrate ( $\text{Na}_3\text{C}_6\text{H}_5\text{O}_7 \cdot 5\text{H}_2\text{O}$ ). After that, the obtained fresh  $\text{Fe}_3\text{O}_4$  microspheres were modified via impregnating with an aqueous solution containing amount of

---

trisodium citrate pentahydrate ( $\text{Na}_3\text{C}_6\text{H}_5\text{O}_7 \cdot 5\text{H}_2\text{O}$ ), which were denoted as Na/ $\text{Fe}_3\text{O}_4$ . Then the Na-promoted  $\text{Fe}_3\text{O}_4$  microsphere samples were allowed by drying at 120 °C under vacuum. All obtained powder samples were reconstructed into pellets (10 MPa), crushed and selected 20-40 mesh particles for  $\text{CO}_2$  hydrogenation reaction tests.

### **Catalyst characterization**

Powder X-ray diffraction (XRD) measurements of the fresh and spent catalysts were analyzed in the  $2\theta$  range from 20 to 80° on X-ray diffractometer (SHIMADZU XRD-6000) with  $\text{Cu K}\alpha$  radiation ( $\lambda=0.154$  nm), operating at 40 kV and 30 mA at a scanning rate of 5°  $\text{min}^{-1}$ . The scan mode is continuous scan and the sampling pitch is 0.02°. The crystallite phase of all samples was determined by standard XRD pattern of the International Diffraction Data Center.

The specific surface area and total pore volume of the catalysts were determined by  $\text{N}_2$  adsorption-desorption measurements at -196 °C, using an automated surface area and pore size analyzer (Micrometrics ASAP 2020 equipment). Before the adsorption measurements, the sample was degassed at 180 °C for 6 h under vacuum.

$\text{CO}_2$  temperature-programmed desorption ( $\text{CO}_2$ -TPD) was carried out on Quantachrome automated gas sorption analyzer. About 0.1 g amount of sample was pretreated at 200 °C for 1 h under  $\text{N}_2$  to remove possible impurities.  $\text{CO}_2$  adsorption was carried out at room temperature for 30 min at a stream of 5 vol%  $\text{CO}_2$ -95vol% Ar. Before the TPD experiments, the physically adsorbed  $\text{CO}_2$  was removed by Ar for 2 h. After pretreatment, the temperature was increased to 800 °C with a temperature rate of 5 °C· $\text{min}^{-1}$  in the flow of Ar gas, and the desorbed  $\text{CO}_2$  was continuously monitored by a TCD detector.

---

The X-ray photoelectron spectroscopy (XPS) measurements were manufactured by SHIMADZU AXIS Supra X-ray photoelectron spectrometer equipped with an Al K $\alpha$  radiation. Prior to experiment, the spent catalysts kept at the glove box were prepared under the Ar atmosphere, and the samples were transferred to the reaction chamber, strictly avoiding air during the whole process. Next, in-situ pretreated with a high purity Ar stream at 200°C for 2h to remove the residual hydrocarbon on the catalyst surface. After pretreated, the samples were then cooled to room temperature and transferred to the analysis chamber without exposure to air for obtaining the XPS data. All the binding energies were calibrated by the C1s peak at 284.8 eV.

The size, morphology and element distribution were analyzed by scanning electron microscope (SEM, Zeiss Supra55). The further insights into the surface morphology and structure were acquired on the high-resolution transmission electron microscope (HR-TEM, JEOL, JEM-2100F). High angle annular dark-field scanning transmission electron microscopy (HAADF-STEM), and energy dispersive X-ray spectroscopy (EDX), were performed on a FEI Tecnai G2 F20 S-Twin transmission electron microscope equipped with an EDX detector. All the specimens were prepared by ultrasonically suspending the sample in ethanol. Afterward, a drop of the suspension was deposited on a coverslip or Ultra-thin carbon film grids and dried in air.

Hydrogen temperature-programmed reduction (H<sub>2</sub>-TPR) experiments were performed on a FINESORB-3010 temperature programmed reduction device, which equipped with a thermal conductivity detector (TCD) to detect the H<sub>2</sub> contents of the tail gas. H<sub>2</sub>-TPR experiments were carried out in a quartz tube reactor using 50 mg prepared catalysts. Before the experiments, the sample was in-situ pretreated with a high purity Ar stream (30 mL·min<sup>-1</sup>) at 120 °C to remove the

---

residual water. After pretreatment, the temperature was increased to 800 °C with a temperature rate of 10 °C·min<sup>-1</sup> in the flow of a 10% H<sub>2</sub>/90% Ar gas mixture (30 mL·min<sup>-1</sup>).

Near ambient pressure X-ray photoelectron spectroscopy (NAP-XPS) experiments of spent catalysts were performed in a SPECS system with base pressure of  $5 \times 10^{-10}$  mbar. Prior to NAP-XPS characterization, the spent catalysts were reduced by the syngas (H<sub>2</sub>/CO=1, 30 mL·min<sup>-1</sup>) for 2 h at 300 °C, followed by cooling down to 30 °C at Ar stream. After preparation, the catalyst was moved to the XPS analyzer, and a total of 400 mtorr gases (100 mtorr CO<sub>2</sub> and 300 mtorr H<sub>2</sub>) were dosed into the main chamber at 30 °C. After gas exposure, the catalyst was heated up to 300 °C for reaction, and the surface carbon species were recorded by NAP-XPS at 30°C, 150°C and 300 °C. All XPS spectra were acquired using a monochromatic Al K $\alpha$  X-ray source ( $h\nu = 1486.6$  eV). The spectrometer was calibrated using the Au 4f<sub>7/2</sub> peak of a clean Au (111) sample before experiments.

Mössbauer spectroscopy measurements were conducted at room temperature in an MR-351 constant-acceleration Mossbauer spectrometer (FAST, Germany), using a 25 mCi <sup>57</sup>Co in Pd matrix. Data analysis was performed using a nonlinear least-squares fitting routine that modeled the spectra as a combination of singlets, quadruple doublets, and magnetic sextets based on a Lorentzian lineshape profile. The components were identified based on their isomer shift (IS), quadruple splitting (QS), and magnetic hyperfine fields (Hhf). Magnetic hyperfine fields were calibrated with the 330 kOe field of  $\alpha$ -Fe foil.

The in-situ diffuse reflectance infrared Fourier transform spectra (in-situ DRIFTS) experiments were recorded with a Bruker Tensor 27 spectrometer, which equipped with a liquid nitrogen-cooled MCT detector, using a diffuse reflectance infrared cell with ZnSe windows. To get clear spectra, the spent catalysts were diluted by KBr. Before in-situ DRIFTS characterization, the diluted samples

---

(about 15 mg) were exposed to high purity Ar ( $30 \text{ mL}\cdot\text{min}^{-1}$ ) gas flow at  $200 \text{ }^\circ\text{C}$  for 1 h to remove the residual water and other contamination. Afterward,  $\text{CO}_2$  was introduced into the cell for 0.5 h, and then the  $\text{H}_2$  (5%  $\text{H}_2$ /95% Ar,  $30 \text{ mL}\cdot\text{min}^{-1}$ ) was introduced to the sample, and the  $\text{H}_2$  adsorption began. The background spectrum of the sample was collected before  $\text{CO}_2$  adsorption. All the above experiments were conducted at ambient pressure and  $200 \text{ }^\circ\text{C}$ . All the spectra were recorded at a resolution of  $4 \text{ cm}^{-1}$  and accumulation of 32 scans.

### **Catalytic reaction**

$\text{CO}_2$  hydrogenation reactions were conducted in a stainless fixed-bed reactor (inner diameter 8 mm). For all the experiments, catalyst (20-40 mesh, 0.5 g) diluted with quartz granule (20-40 mesh, 1 g) was loaded into the fixed-bed reactor. The flow rates of the gases were controlled using mass flow meters (5850E, Brooks). The mixture gas flow composition was, 71.25%  $\text{H}_2$  : 23.75%  $\text{CO}_2$  : 5% Ar (volume ratio), unless otherwise indicated, where Ar was used as inner reference gas. The reactor was raised to  $300 \text{ }^\circ\text{C}$  at a heating rate of  $2^\circ\text{C}/\text{min}$  at 0.1 MPa by syngas ( $\text{H}_2/\text{CO}=1$ ), and then the reduction progress was carried out in-situ for 10 hours by syngas, followed by cooling down to  $80 \text{ }^\circ\text{C}$  in  $\text{N}_2$ . After that, the pressure of the reactor was regulated to 0.5 or 3 MPa by the mixture gas, the temperature of reactor was ramped to  $300 \text{ }^\circ\text{C}$  at a heating rate of  $10^\circ\text{C}/\text{min}$ . Afterward, the  $\text{CO}_2$  hydrogenation reaction was continuously carried out at  $300 \text{ }^\circ\text{C}$ , 0.5 MPa /3.0 MPa,  $\text{H}_2/\text{CO}_2=3$ , and GHSV= $2500 \text{ mL}/\text{g}\cdot\text{cat}\cdot\text{h}^{-1}$  for 50 hours. The spent catalysts, tested under different reaction pressure, were respectively denoted as  $\text{Fe}_3\text{O}_4$  0.5 MPa,  $\text{Fe}_3\text{O}_4$  3.0 MPa, Na/ $\text{Fe}_3\text{O}_4$  0.5 MPa, Na/ $\text{Fe}_3\text{O}_4$  3.0 MPa. After reaction, the sample collection is done inside the glovebox by placing the reaction tube inside without any exposure to the air, and the collected spent catalysts were kept in an Ar-filled glovebox to avoid overoxidation before further characterization.

---

The effluent gas from the reactor was analyzed by on-line gas chromatography (GC-2014C, Shimadzu). The Ar, CO, and CO<sub>2</sub> contents of the outlet gases were determined by using a activate carbon column with a thermal conductivity detector (TCD), using H<sub>2</sub> as the carrier gas. Hydrocarbons (C<sub>1</sub>–C<sub>5</sub>) were analyzed on-line using Porapak-Q column with an N<sub>2</sub> carrier and a hydrogen flame ionization detector (FID). The collected liquid products (C<sub>5+</sub>) and oxygenates were analyzed offline on GC-FID with an N<sub>2</sub> carrier by silicone SE-30 column and Plot Q capillary column, respectively. The calculated mass balance is almost 95%, which is based on the moles of carbon in all reactions.

The CO<sub>2</sub> conversion was calculated based on the following Eq:

$$CO_2 \text{ Conversion} = \frac{\frac{CO_{2in}}{Ar} - \frac{CO_{2out}}{Ar}}{\frac{CO_{2in}}{Ar}}$$

The carbon balance of produce was given according to the following Eq:

$$\text{Carbon balance} = \frac{\text{The mol of CO} + \sum_{i=1}^n \text{mol of } C_i \text{ product}}{\text{The toatl mol of CO}_2} \times 100\%$$

Where C<sub>i</sub> is the product i (hydrocarbon or oxygenates),

The selectivity of individual hydrocarbon or oxygenates product S<sub>i</sub> was calculated from the following Eq:

$$S_i = \frac{M_i \times X_i}{\sum_{i=1}^n M_i \times X_i} \times 100\%$$

Where M<sub>i</sub> is the relative molecular mass of product i (hydrocarbon or oxygenates), X<sub>i</sub> is the mole fraction of product i (hydrocarbon or oxygenates).

The Yield of alkenes produce was given according to the following Eq:

---

$$Yield = CO_{2_{Conversion}} \times (1 - CO_{selectivity}) \times CH_{n_{selectivity}} \times Alkenes_{selectivity\ in\ CHn} \times 100\%$$

The Yield of ethanol produce was given according to the following Eq:

$$Yield = CO_{2_{Conversion}} \times (1 - CO_{selectivity}) \times ROH_{selectivity} \times Ethanol_{selectivity\ in\ ROH} \times 100\%$$

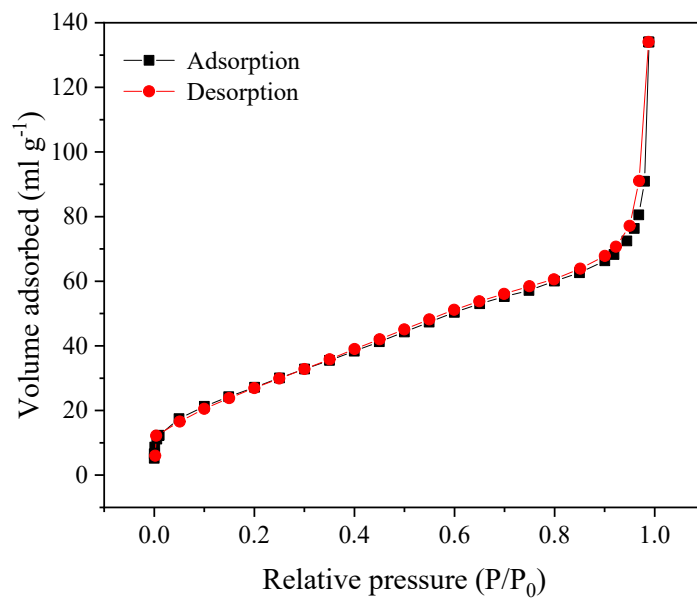

**Figure S1.** N<sub>2</sub> adsorption-desorption isotherms of the fresh Fe<sub>3</sub>O<sub>4</sub> microsphere catalyst.

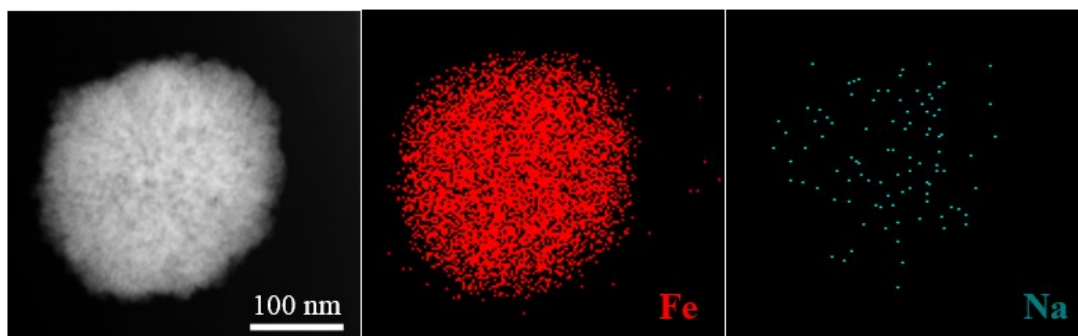

**Figure S2.** STEM-EDX elemental mapping of fresh Na/Fe<sub>3</sub>O<sub>4</sub> catalyst.



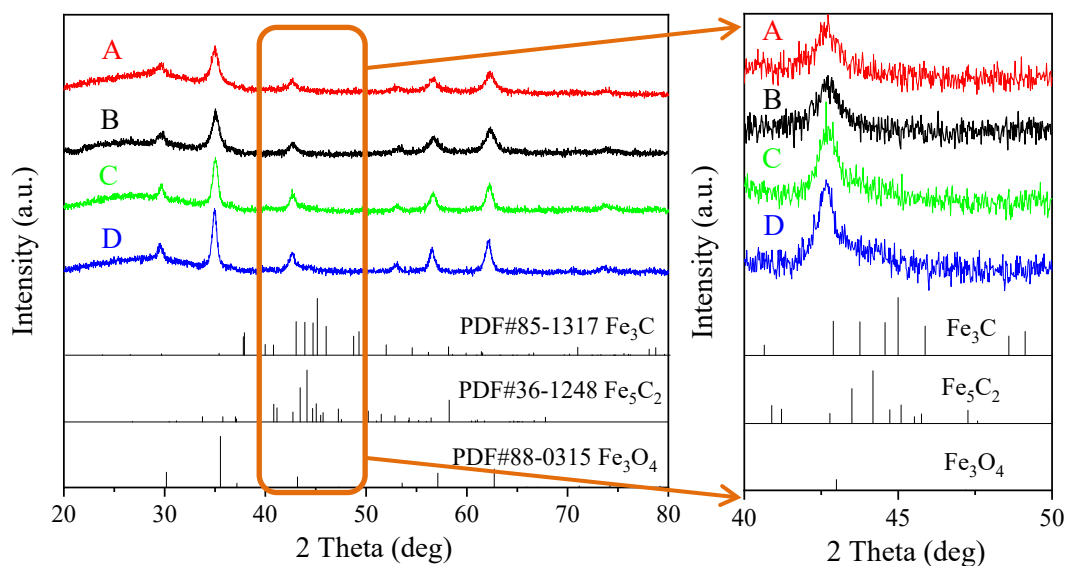

**Figure S3.** XRD patterns for the spent catalysts 0.5 MPa reaction: A) Na/Fe<sub>3</sub>O<sub>4</sub> catalyst and B) Fe<sub>3</sub>O<sub>4</sub> catalyst; 3.0 MPa reaction: C) Na/Fe<sub>3</sub>O<sub>4</sub> catalyst and D) Fe<sub>3</sub>O<sub>4</sub> catalyst.

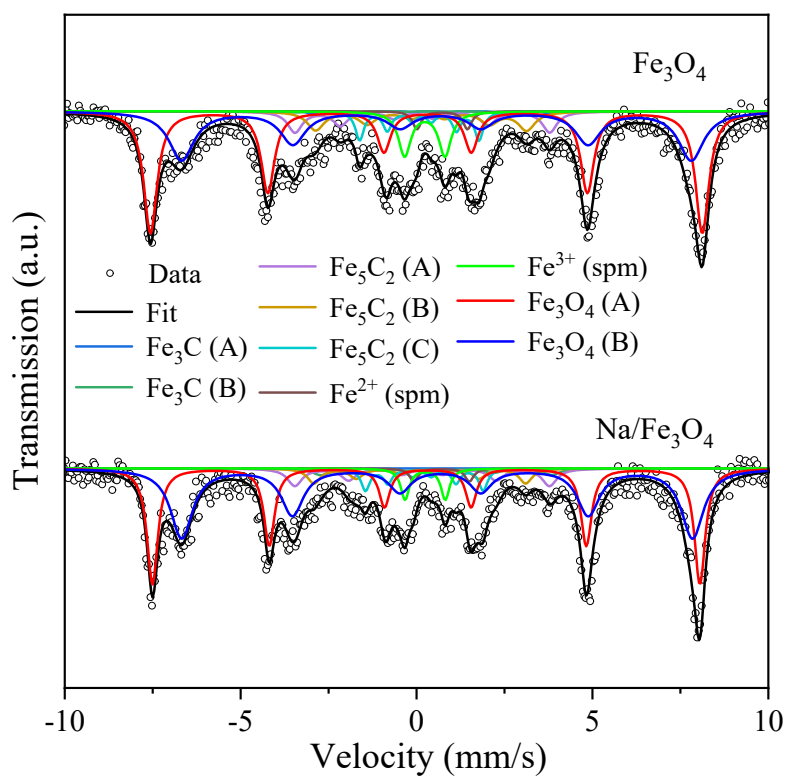

**Figure S4.** Mössbauer spectroscopy of various reduced catalysts.

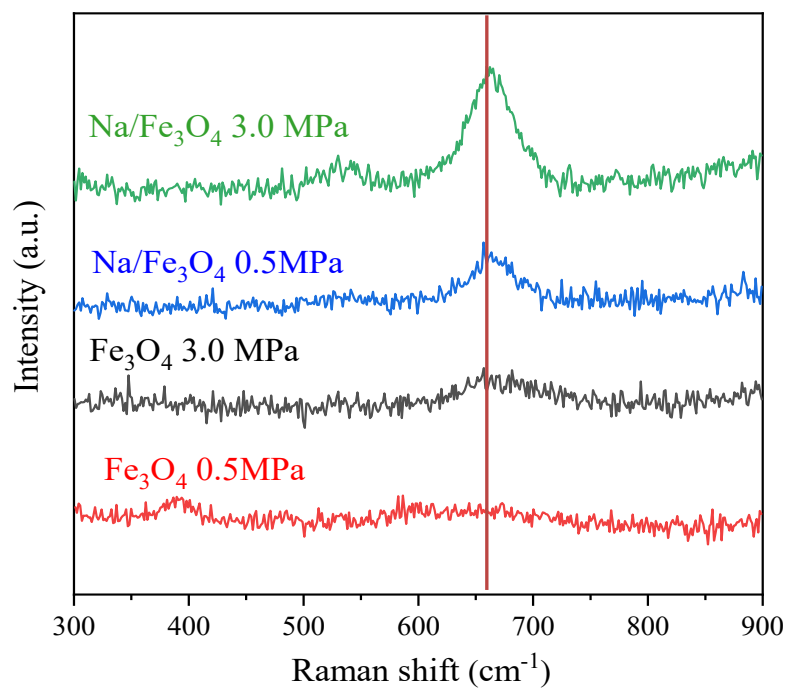

**Figure S5.** Raman spectra of the of various reduced catalysts.

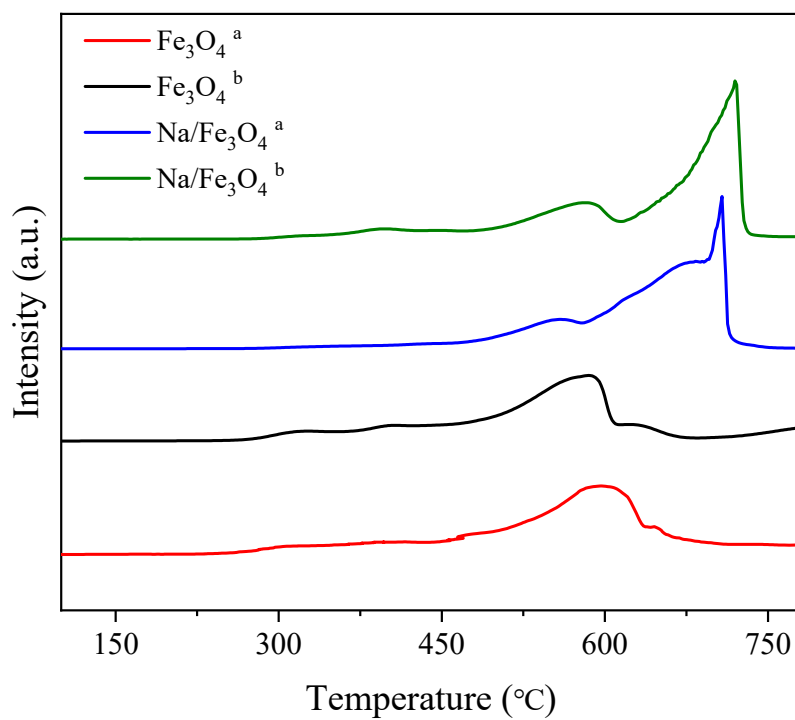

**Figure S6.** The  $\text{CO}_2$ -TPD of various spent catalysts. a) 0.5 MPa reaction; b) 3.0 MPa reaction.

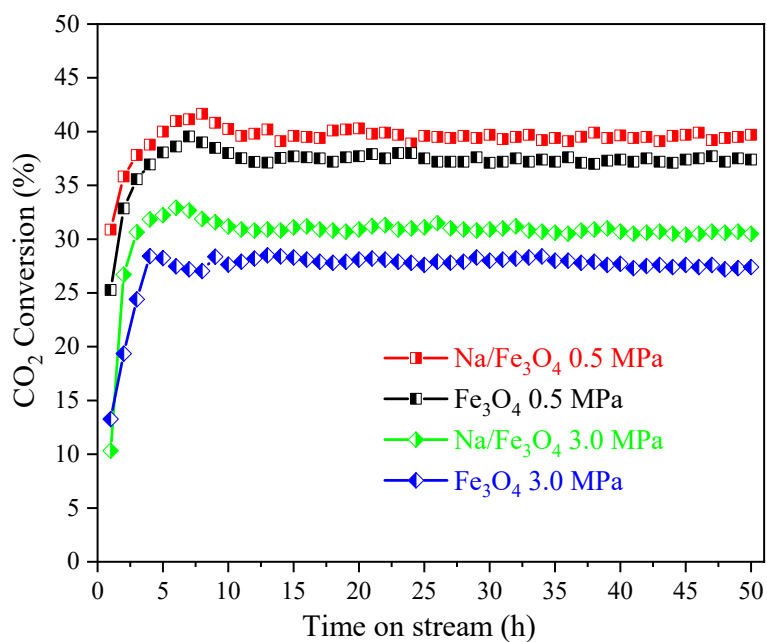

**Figure S7.** CO<sub>2</sub> conversion and stability test of the catalysts. Reaction conditions: 300 °C, 0.5 MPa /3.0 MPa, H<sub>2</sub>/CO<sub>2</sub>=3, and GHSV=2500 mL/g-cat·h<sup>-1</sup> for 50 hours.

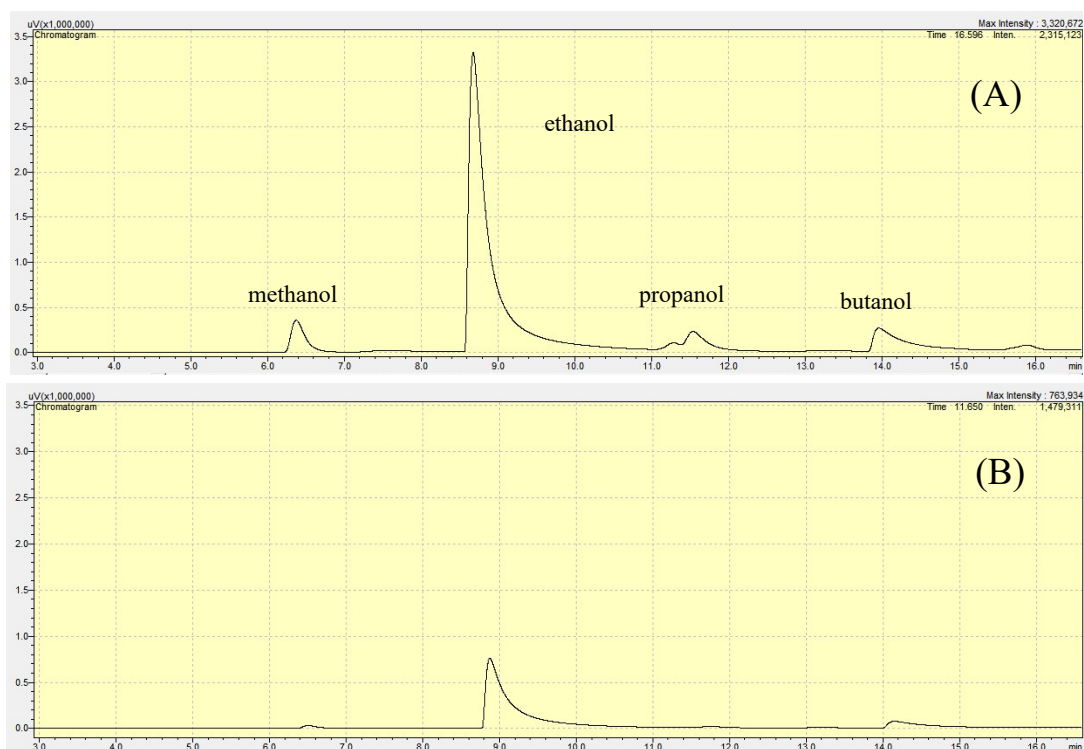

**Figure S8.** GC spectra of liquid phases (alcohol phase) of the iron-based catalysts: (A) Na/Fe<sub>3</sub>O<sub>4</sub>

3.0MPa, (B) Na/Fe<sub>3</sub>O<sub>4</sub> 0.5MPa.

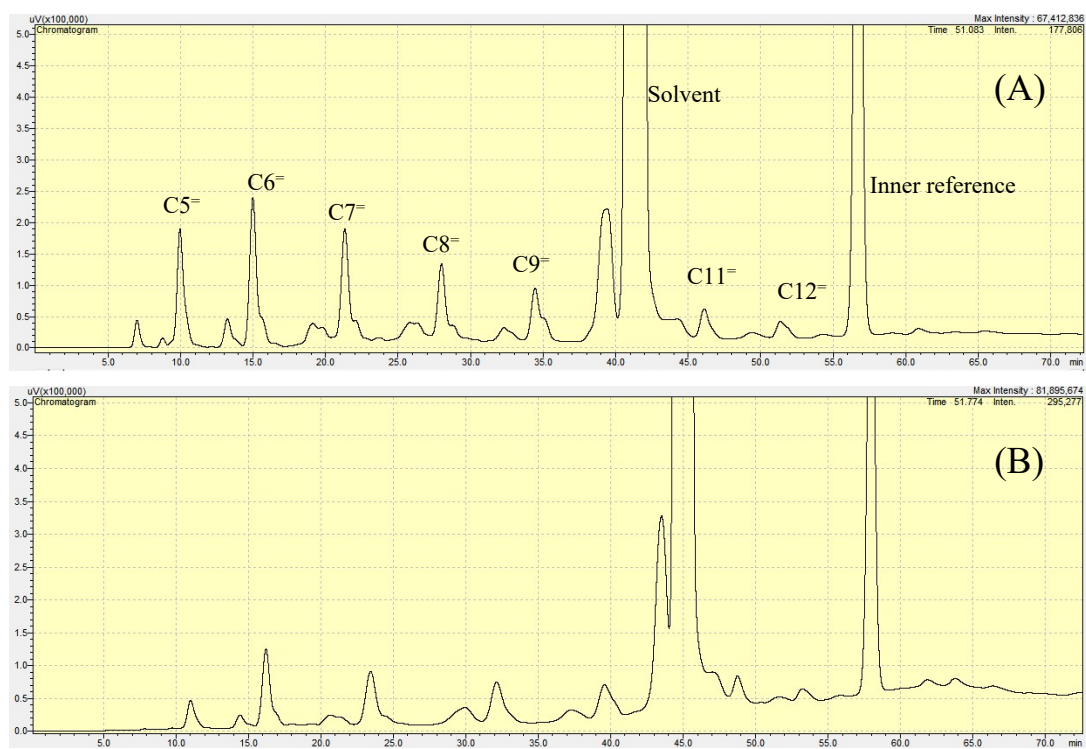

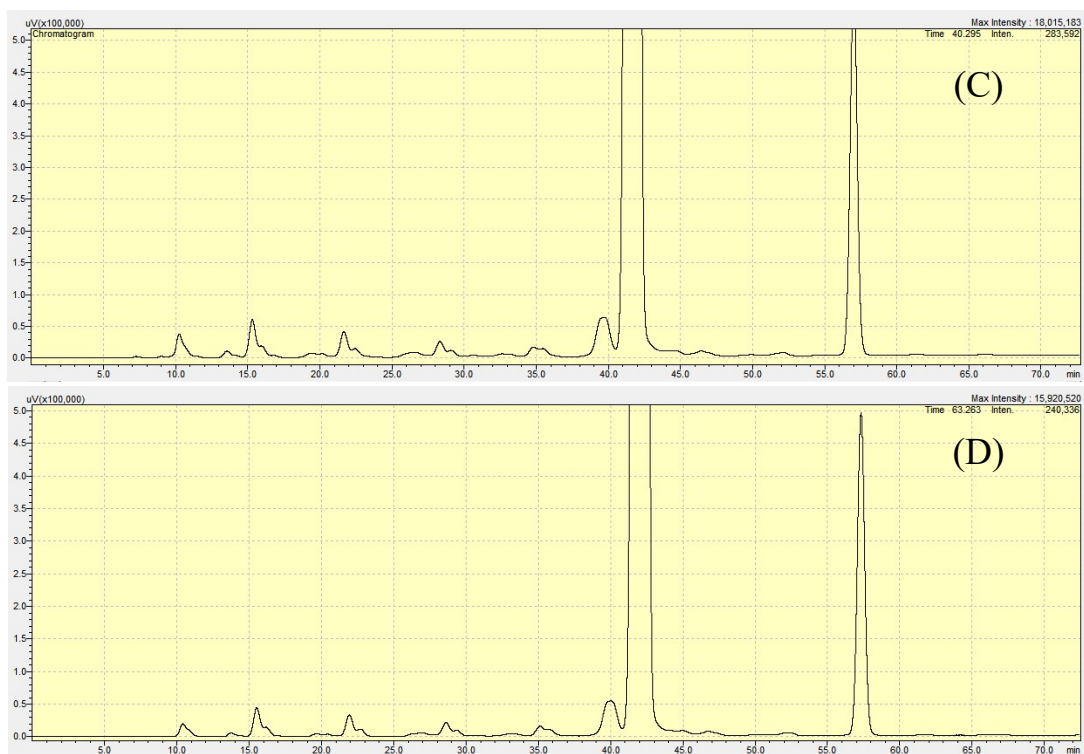

**Figure S9.** GC spectra of liquid phases (liquid phases) of the iron-based catalysts: (A) Na/Fe<sub>3</sub>O<sub>4</sub> 0.5 MPa, (B) Na/Fe<sub>3</sub>O<sub>4</sub> 3.0 MPa, (C) Fe<sub>3</sub>O<sub>4</sub> 0.5 MPa, (B) Fe<sub>3</sub>O<sub>4</sub> 3.0 MPa.

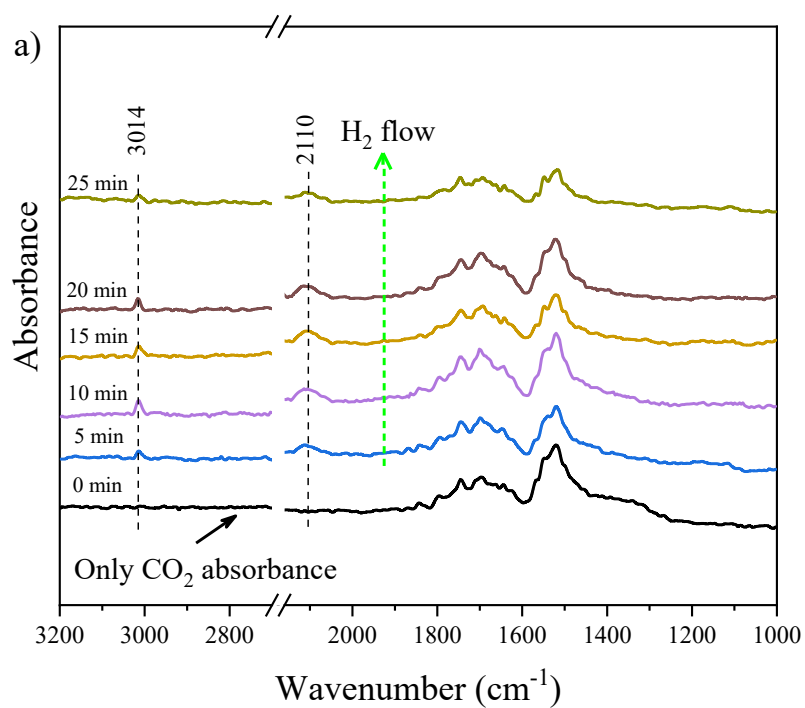

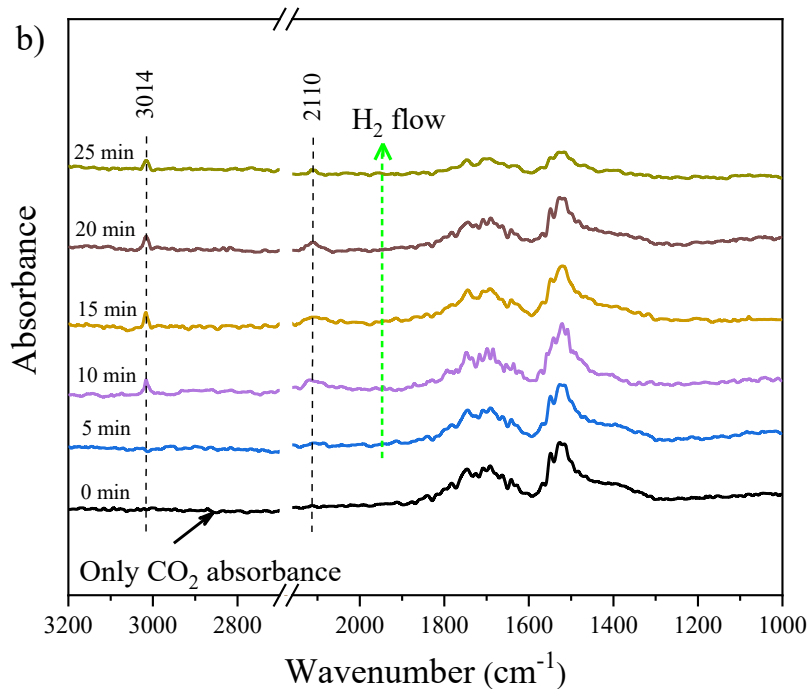

**Figure S10.** In-situ CO<sub>2</sub>-DRIFT spectra of the spent un-promoted Fe<sub>3</sub>O<sub>4</sub> catalysts. a) 0.5 MPa reaction and b) 3.0 MPa reaction.

**Table S1.** Mössbauer parameters of the reduced catalysts.

| Catalysts                         | Phases                             | Mössbauer parameters |           |           |          |
|-----------------------------------|------------------------------------|----------------------|-----------|-----------|----------|
|                                   |                                    | IS (mm/s)            | QS (mm/s) | Hhf (kOe) | Area (%) |
| Fe <sub>3</sub> O <sub>4</sub>    | Fe <sub>5</sub> C <sub>2</sub>     | 0.05                 | 0.23      | 225       | 7.4      |
|                                   |                                    | 0.23                 | -0.20     | 186       | 7.7      |
|                                   |                                    | 0.11                 | -0.07     | 105       | 5.9      |
|                                   | Fe <sub>3</sub> C                  | 0.39                 | -0.003    | 210       | 0.5      |
|                                   |                                    | 0.05                 | -0.30     | 207       | 0.5      |
|                                   | Fe <sub>3</sub> O <sub>4</sub> (A) | 0.30                 | -0.04     | 487       | 39.7     |
|                                   | Fe <sub>3</sub> O <sub>4</sub> (B) | 0.62                 | -0.12     | 450       | 29.7     |
|                                   | Fe <sup>2+</sup> (spm)             | 0.73                 | 1.43      |           | 1.9      |
| Fe <sup>3+</sup> (spm)            | 0.24                               | 1.15                 |           | 6.7       |          |
| Na/Fe <sub>3</sub> O <sub>4</sub> | Fe <sub>5</sub> C <sub>2</sub>     | 0.15                 | -0.006    | 225       | 7.8      |
|                                   |                                    | 0.05                 | 0.06      | 187       | 6.2      |

|  |                                    |      |       |     |      |
|--|------------------------------------|------|-------|-----|------|
|  |                                    | 0.17 | 0.07  | 104 | 6.0  |
|  | Fe <sub>3</sub> C                  | 0.40 | 0.30  | 204 | 2.9  |
|  | Fe <sub>3</sub> O <sub>4</sub> (A) | 0.28 | -0.05 | 483 | 31.6 |
|  | Fe <sub>3</sub> O <sub>4</sub> (B) | 0.62 | -0.09 | 451 | 40.4 |
|  | Fe <sup>2+</sup> (spm)             | 0.70 | 1.57  |     | 1.5  |
|  | Fe <sup>3+</sup> (spm)             | 0.23 | 1.14  |     | 3.6  |

**Table S2.** The results of in-situ XPS for Fe 2p<sub>3/2</sub>.

| Catalysts                                      | Binding energy (eV)            |                   |                  |                  | Surface content of iron species |                   |                  |                  | Fe <sup>2+</sup> /Fe <sup>3+</sup> |
|------------------------------------------------|--------------------------------|-------------------|------------------|------------------|---------------------------------|-------------------|------------------|------------------|------------------------------------|
|                                                | Fe 2p <sub>3/2</sub>           |                   |                  |                  | (atom%) Fe 2p <sub>3/2</sub>    |                   |                  |                  |                                    |
|                                                | Fe <sub>5</sub> C <sub>2</sub> | Fe <sub>3</sub> C | Fe <sup>2+</sup> | Fe <sup>3+</sup> | Fe <sub>5</sub> C <sub>2</sub>  | Fe <sub>3</sub> C | Fe <sup>2+</sup> | Fe <sup>3+</sup> |                                    |
| Fe <sub>3</sub> O <sub>4</sub> <sup>a</sup>    | 707.2                          | 708.3             | 709.7            | 711.7            | 28.7                            | 7.1               | 31.4             | 32.8             | 0.95                               |
| Na/Fe <sub>3</sub> O <sub>4</sub> <sup>a</sup> | 707.1                          | 708.0             | 709.6            | 711.6            | 25.1                            | 17.6              | 35.4             | 21.8             | 1.62                               |
| Fe <sub>3</sub> O <sub>4</sub> <sup>b</sup>    | 707.2                          | 708.2             | 709.8            | 711.8            | 16.1                            | 4.9               | 36.8             | 42.1             | 0.87                               |
| Na/Fe <sub>3</sub> O <sub>4</sub> <sup>b</sup> | 707.0                          | 708.1             | 709.6            | 711.6            | 24.0                            | 10.8              | 48.1             | 17.0             | 2.83                               |

<sup>a</sup> CO<sub>2</sub>-0.5 MPa reaction.

<sup>b</sup> CO<sub>2</sub>-3.0 MPa reaction.

**Table S3.** The results of in-situ XPS for O 1s.

| Catalysts                                      | Binding energy (eV)            |                      |                     | Surface content of O species   |                      |                     |
|------------------------------------------------|--------------------------------|----------------------|---------------------|--------------------------------|----------------------|---------------------|
|                                                | O 1s                           |                      |                     | (atom%)                        |                      |                     |
|                                                | Fe <sub>3</sub> O <sub>4</sub> | O <sub>lattice</sub> | O <sub>defect</sub> | Fe <sub>3</sub> O <sub>4</sub> | O <sub>lattice</sub> | O <sub>defect</sub> |
| Fe <sub>3</sub> O <sub>4</sub> <sup>a</sup>    | 529.7                          | 531.5                | 533.1               | 39.1                           | 45.9                 | 15.0                |
| Na/Fe <sub>3</sub> O <sub>4</sub> <sup>a</sup> | 529.8                          | 531.9                | 533.5               | 23.1                           | 48.1                 | 28.8                |
| Fe <sub>3</sub> O <sub>4</sub> <sup>b</sup>    | 529.7                          | 531.4                | 533.4               | 26.8                           | 56.4                 | 16.8                |
| Na/Fe <sub>3</sub> O <sub>4</sub> <sup>b</sup> | 529.8                          | 532.0                | 533.4               | 27.3                           | 39.6                 | 33.1                |

<sup>a</sup> CO<sub>2</sub>-0.5 MPa reaction.

<sup>b</sup> CO<sub>2</sub>-3.0 MPa reaction.

**Table S4.** Comparison of the catalytic performance for the formation of alkenes from CO<sub>2</sub> hydrogenation in literatures.

| Catalysts                                                    | CO <sub>2</sub> conv.% | CO Sel. % | Hydrocarbon sel. (wt%) |                   |        | alkenes Yield % | Ref.      |
|--------------------------------------------------------------|------------------------|-----------|------------------------|-------------------|--------|-----------------|-----------|
|                                                              |                        |           | CH <sub>4</sub>        | alkenes           | others |                 |           |
| In <sub>2</sub> O <sub>3</sub> -ZrO <sub>2</sub><br>/SAPO-34 | 35.5                   | 85.0      | 4.3                    | 76.4 <sup>a</sup> | 19.3   | 4.1             | 1         |
| Zn-ZrO <sub>2</sub><br>/ZnSAPO-34                            | 12.6                   | 47.0      | 3.0                    | 80.0 <sup>a</sup> | 17.0   | 5.3             | 2         |
| ZnGa <sub>2</sub> O <sub>4</sub><br>/SAPO-34                 | 13.0                   | 49.0      | 1.0                    | 86.0 <sup>a</sup> | 13.0   | 5.7             | 3         |
| Fe <sub>2</sub> N@C                                          | 33.7                   | 15.8      | 46.0                   | 31.0              | 23.0   | 8.8             | 4         |
| Fe/C-bio                                                     | 30.5                   | 23.2      | 11.8                   | 72.0              | 16.2   | 16.9            | 5         |
| Fe <sub>2</sub> O <sub>3</sub> @KO <sub>2</sub>              | 48.3                   | 15.9      | 15.2                   | 57.4              | 27.4   | 23.3            | 6         |
| Na/Fe <sub>3</sub> O <sub>4</sub><br>0.5 MPa                 | 39.6                   | 7.1       | 18.0                   | 73.2              | 8.8    | 22.03           | This work |

<sup>a</sup> C<sub>2</sub>=C<sub>4</sub>=olefins.

Note: Alkenes yield max error  $\leq \pm 1\%$ .

**Table S5.** Comparison of the catalytic performance for the formation of ethanol from CO<sub>2</sub> hydrogenation in literatures.

| Catalysts                                     | CO <sub>2</sub> conv.% | CO Sel. % | Product sel. (wt%) |      |                  | ethanol Yield % | Ref.      |
|-----------------------------------------------|------------------------|-----------|--------------------|------|------------------|-----------------|-----------|
|                                               |                        |           | CH <sub>n</sub>    | ROH  | Ethanol (in ROH) |                 |           |
| Na-Co/SiO <sub>2</sub>                        | 18.8                   | 29.1      | 86.6               | 13.4 | 62.8             | 1.12            | 7         |
| RhFeLi/TiO <sub>2</sub><br>NRs                | 15.7                   | 12.5      | 36.3               | 63.7 | 95.3             | 8.33            | 8         |
| Rh-0.3VO <sub>x</sub> /<br>MCM-41             | 12.1                   | 20.1      | 36.4               | 63.6 | 82.2             | 5.04            | 9         |
| Mesoporous-<br>Co <sub>3</sub> O <sub>4</sub> | 12.5                   | -         | 36.1               | 63.9 | 48.2             | 3.85            | 10        |
| Cu@Na-Beta                                    | 7.9                    | 30.5      | -                  | 100  | 100              | 5.49            | 11        |
| Na/Fe <sub>3</sub> O <sub>4</sub><br>3.0 MPa  | 30.6                   | 4.1       | 56.2               | 43.8 | 87.4             | 11.23           | This work |

Note: ethanol yield max error  $\leq \pm 1\%$ .



**Table S6.** The activity and selectivity of various pressure for the Na/Fe<sub>3</sub>O<sub>4</sub> catalyst.

| Catal.   | CO <sub>2</sub> conv.<br>(%) | CO <sub>2</sub> to<br>CO (%) | Product         |      | Hydrocarbon Selectivity in CH <sub>n</sub> |                               |                               |                  | Alcohol Selectivity in |      |                       |
|----------|------------------------------|------------------------------|-----------------|------|--------------------------------------------|-------------------------------|-------------------------------|------------------|------------------------|------|-----------------------|
|          |                              |                              | Selectivity     |      | (wt %)                                     |                               |                               |                  | ROH (wt %)             |      |                       |
|          |                              |                              | CH <sub>n</sub> | ROH  | CH <sub>4</sub>                            | Alkenes<br>(C <sub>2+</sub> ) | Alkanes<br>(C <sub>2+</sub> ) | O/P <sup>c</sup> | MeOH                   | EtOH | C <sub>2+</sub><br>OH |
| 0.25 MPa | 30.6                         | 15.5                         | 99.5            | 0.5  | 37.5                                       | 47.8                          | 14.7                          | 6.0              | -                      | -    | -                     |
| 1.0 MPa  | 40.2                         | 6.2                          | 80.2            | 19.8 | 19.1                                       | 68.8                          | 12.1                          | 9.6              | 5.1                    | 65.7 | 29.2                  |
| 2.0 MPa  | 37.0                         | 5.9                          | 78.5            | 21.5 | 21.5                                       | 63.3                          | 15.2                          | 8.1              | 4.5                    | 75.2 | 20.3                  |
| 4.0 MPa  | 29.5                         | 5.1                          | 68.1            | 31.9 | 27.1                                       | 56.0                          | 16.9                          | 4.1              | 3.8                    | 79.7 | 16.5                  |

Reaction conditions: 300°C, H<sub>2</sub>/CO<sub>2</sub> = 3, GHSV=2500 mL/g-cat·h<sup>-1</sup>.

## References

1. P. Gao, S.S. Dang, S.G. Li, X. Bu, Z.Y. Liu, M.H. Qiu, C.G. Yang, H. Wang, L.S. Zhong, Han, Y., Q. Liu, W. Wei, and Y. Sun, *ACS Catal.*, 2018, **8**, 571-578.
2. Z. Li, J. Wang, Y. Qu, H. Liu, C. Tang, S. Miao, Z. Feng, H. An, and C. Li, *ACS Catal.*, 2017, **7**, 8544-8548.
3. X. Liu, M. Wang, C. Zhou, W. Zhou, K. Cheng, J. Kang, Q. Zhang, W. Deng, and Y. Wang, *Chem. Commun.*, 2018, **54**, 140-143.
4. B. Zhao, M. Sun, F. Chen, Y. Shi, Y. Yu, X. Li, and B. Zhang, *Angew. Chem. Int. Ed.*, 2021, **60**, 1-6.
5. L. Guo, J. Sun, X. Ji, J. Wei, Z. Wen, R. Yao, H. Xu, and Q. Ge, *Commun. Chem.*, 2018, **1**, 11.
6. A. Ramirez, A.D. Chowdhury, A. Dokania, P. Cnudde, M. Caglan, I. Yarulina, E. Abou-Hamad, L. Gevers, S. Ould-Chikh, K. De Wispelaere, V. van Speybroeck, and J. Gascon, *ACS Catal.*, 2019, **9**, 6320-6334.
7. S. Zhang, X.F. Liu, Z.L. Shao, H. Wang, and Y.H. Sun, *J. Catal.*, 2020, **382**, 86-96.
8. C.S. Yang, R.T. Mu, G.S. Wang, J. Song, H. Tian, Z.-J. Zhao, and J.L. Gong, *Chem. Sci.*, 2019, **10**, 3161-3167.
9. G. Wang, R. Luo, C. Yang, J. Song, C. Xiong, H. Tian, Z.J. Zhao, R. Mu, and J. Gong, *Sci. China*

- 
- Chem., 2019, **62**, 1710-1719.
10. B. Liu, B. Ouyang, Y. Zhang, K. Lv, Q. Li, Y. Ding, and J. Li, *J. Catal.*, 2018, **366**, 91-97.
  11. L.P. Ding, T. Shi, J. Gu, Y. Cui, Z.Y. Zhang, C.J. Yang, T. Chen, M. Lin, P. Wang, N.H. Xue, L. Peng, X. Guo, Y. Zhu, Z. Chen, and W. Ding, *Chem*, 2020, **6**, 1-17.
